# Supplementary material for: WWP2 regulates pathological cardiac fibrosis by modulating SMAD2 signaling
Source: PubMed Central journal article supplement (PMC6689010; doi:10.1038/s41467-019-11551-9), 2019-08-09

**Supplementary information for WB**

**WWP2 regulates pathological cardiac fibrosis by modulating  
SMAD2 signaling**

Huimei Chen\*, Aida Moreno-Moral\*, et al.

### Original blot of Figure 3

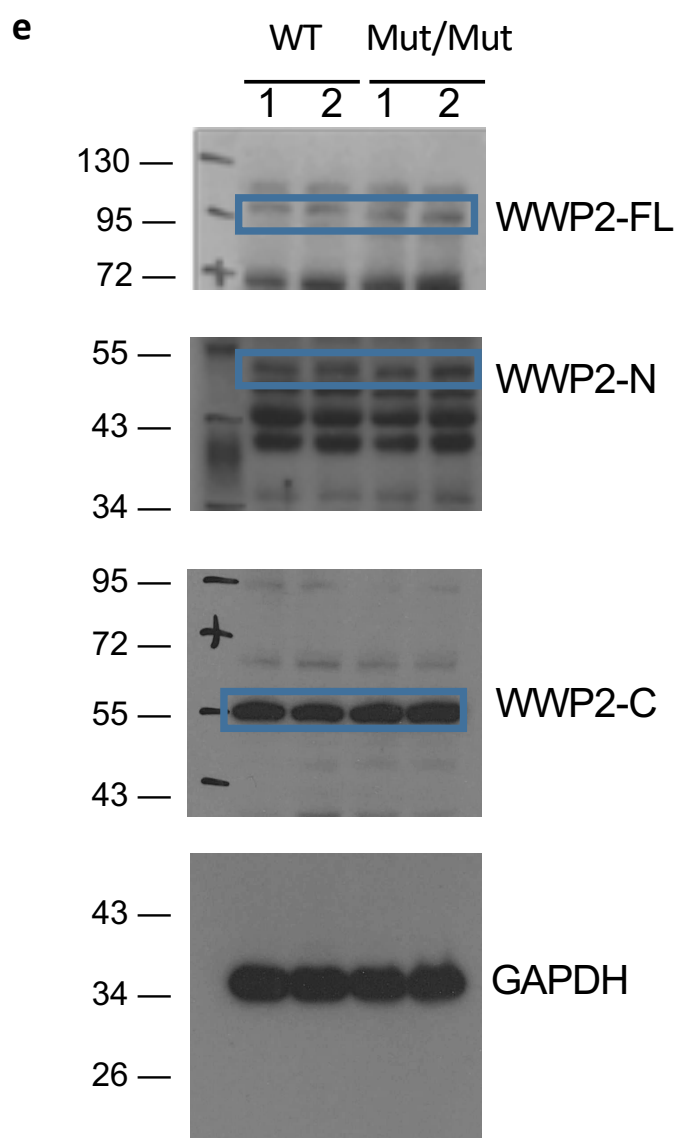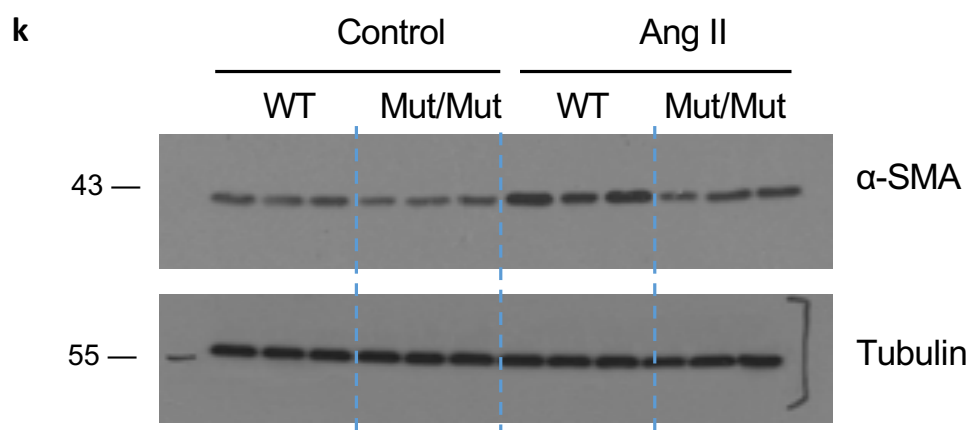

**Original blot of Figure 3**

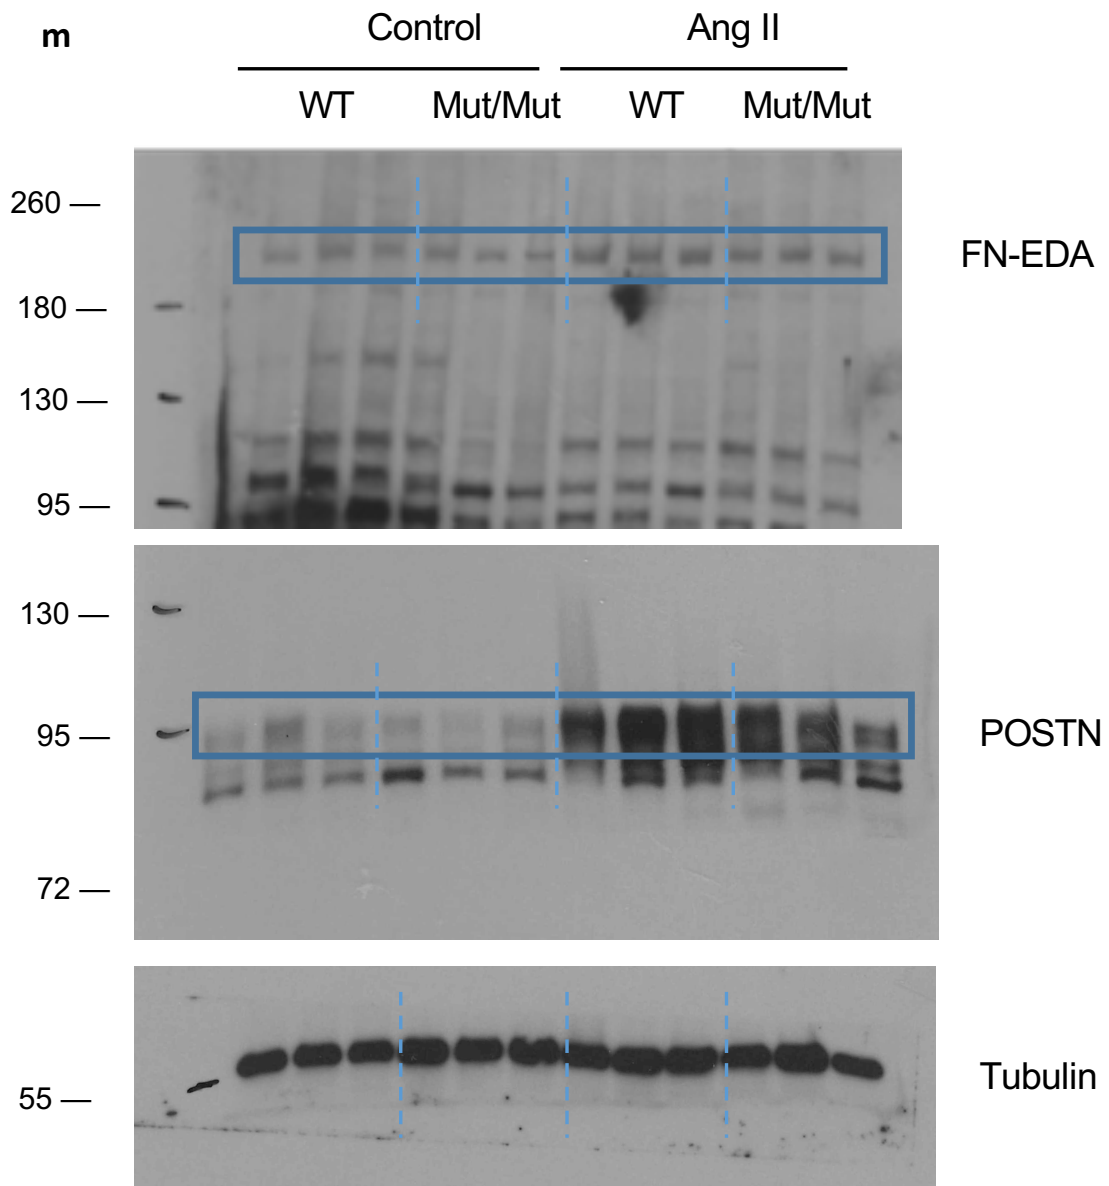

Original blot of Figure 4

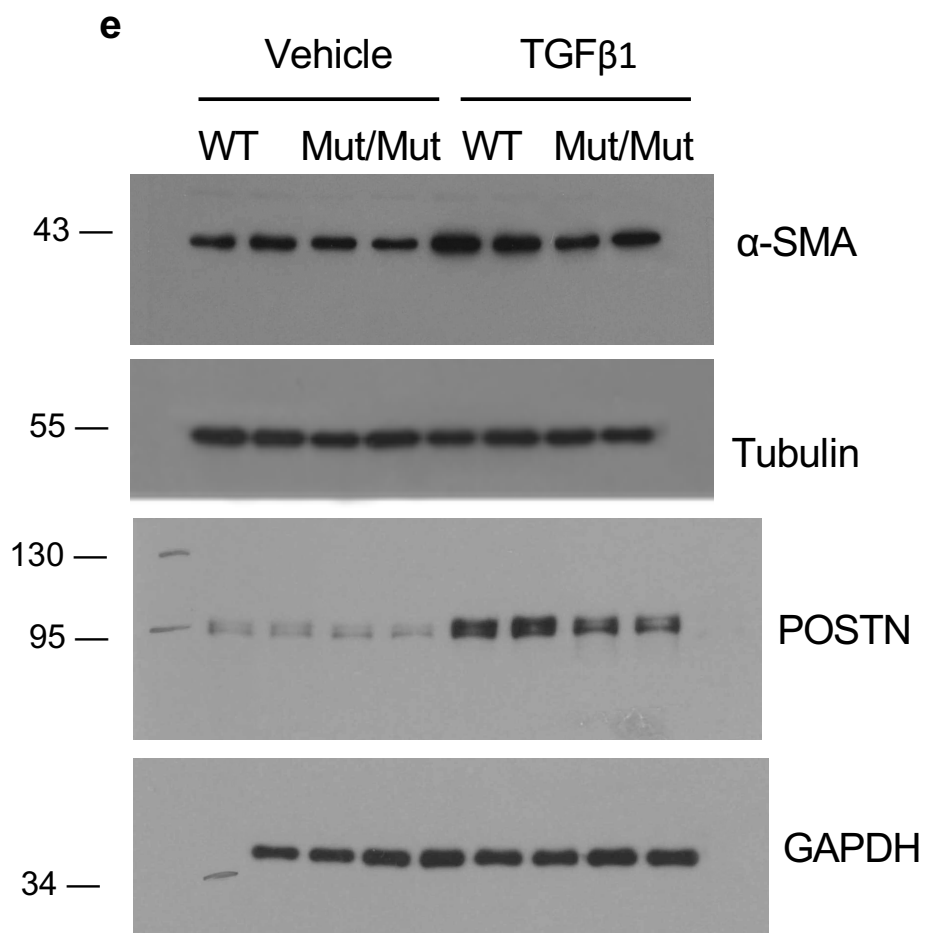

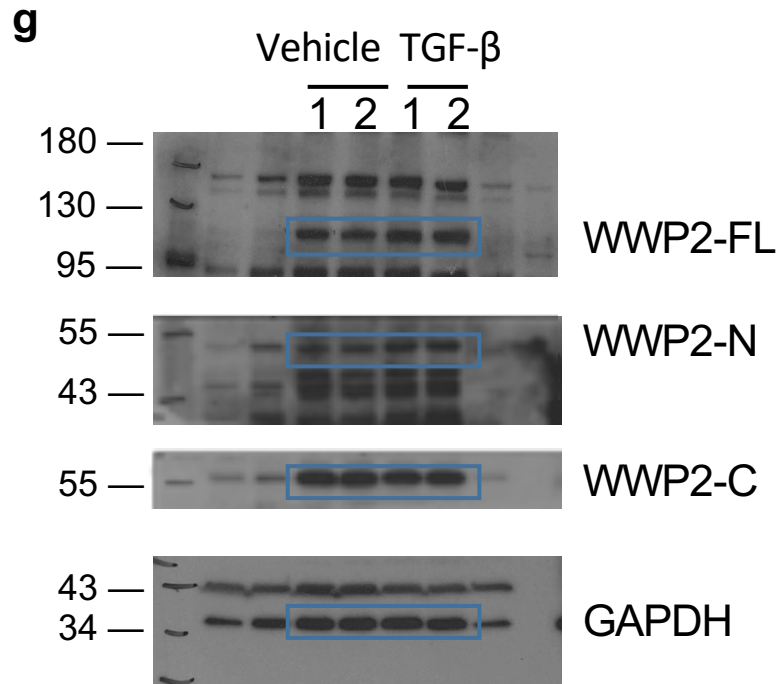

**Original blot of Figure 4**

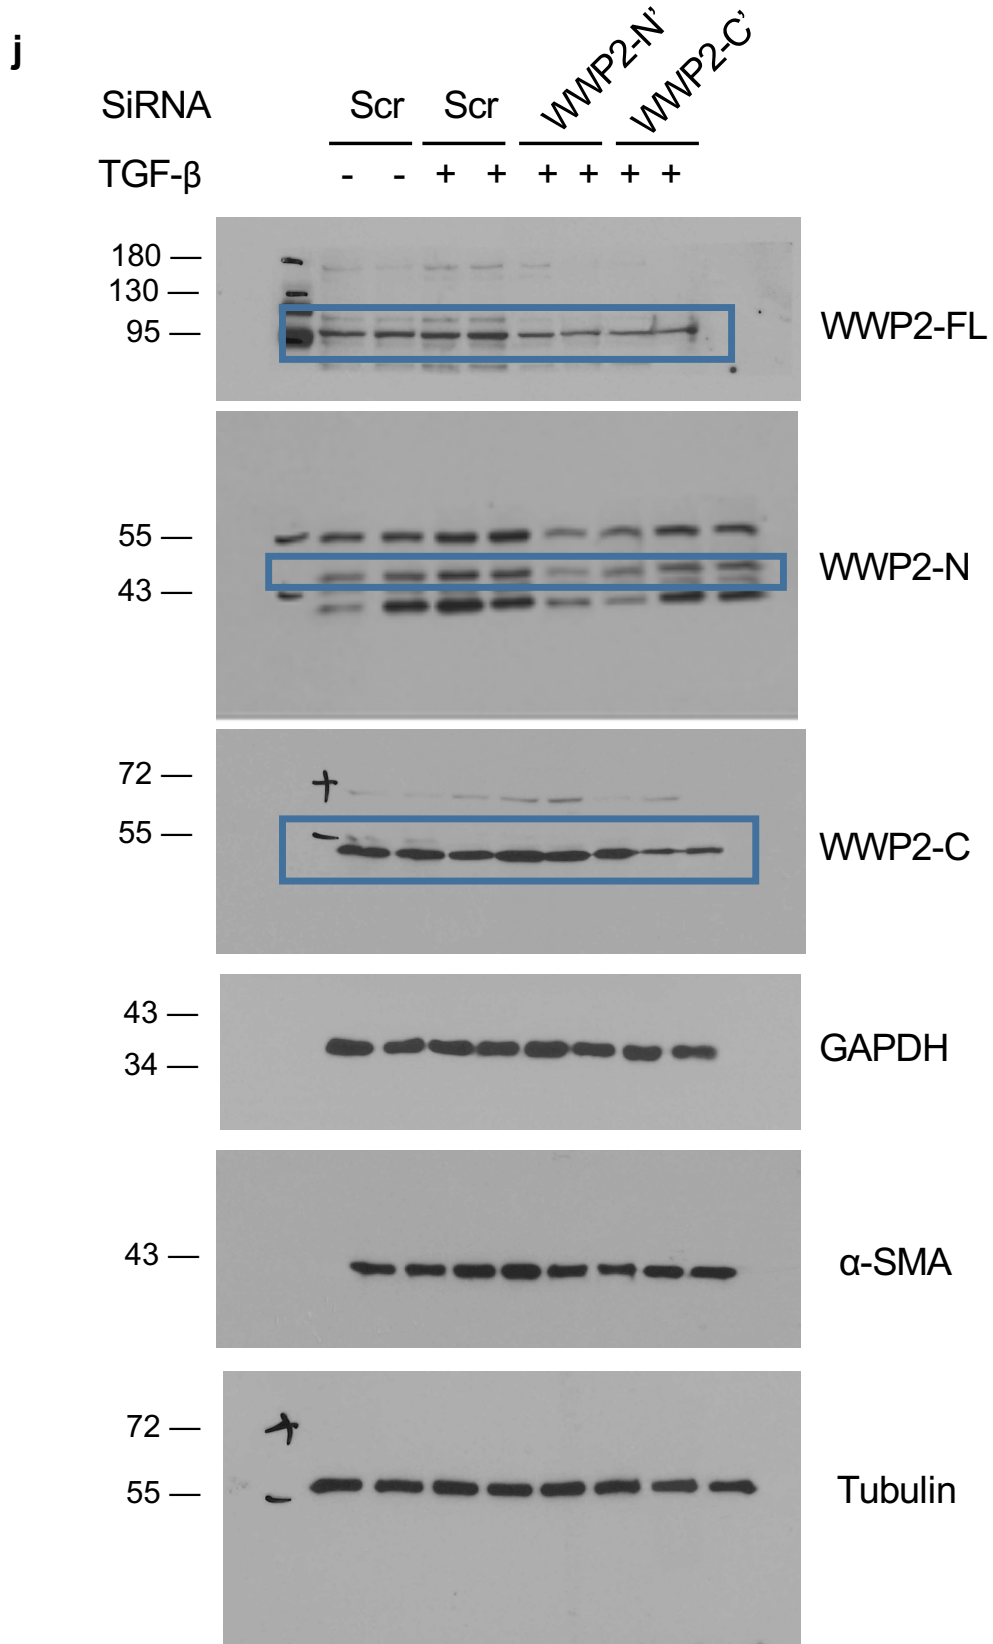

Original blot of Figure 4

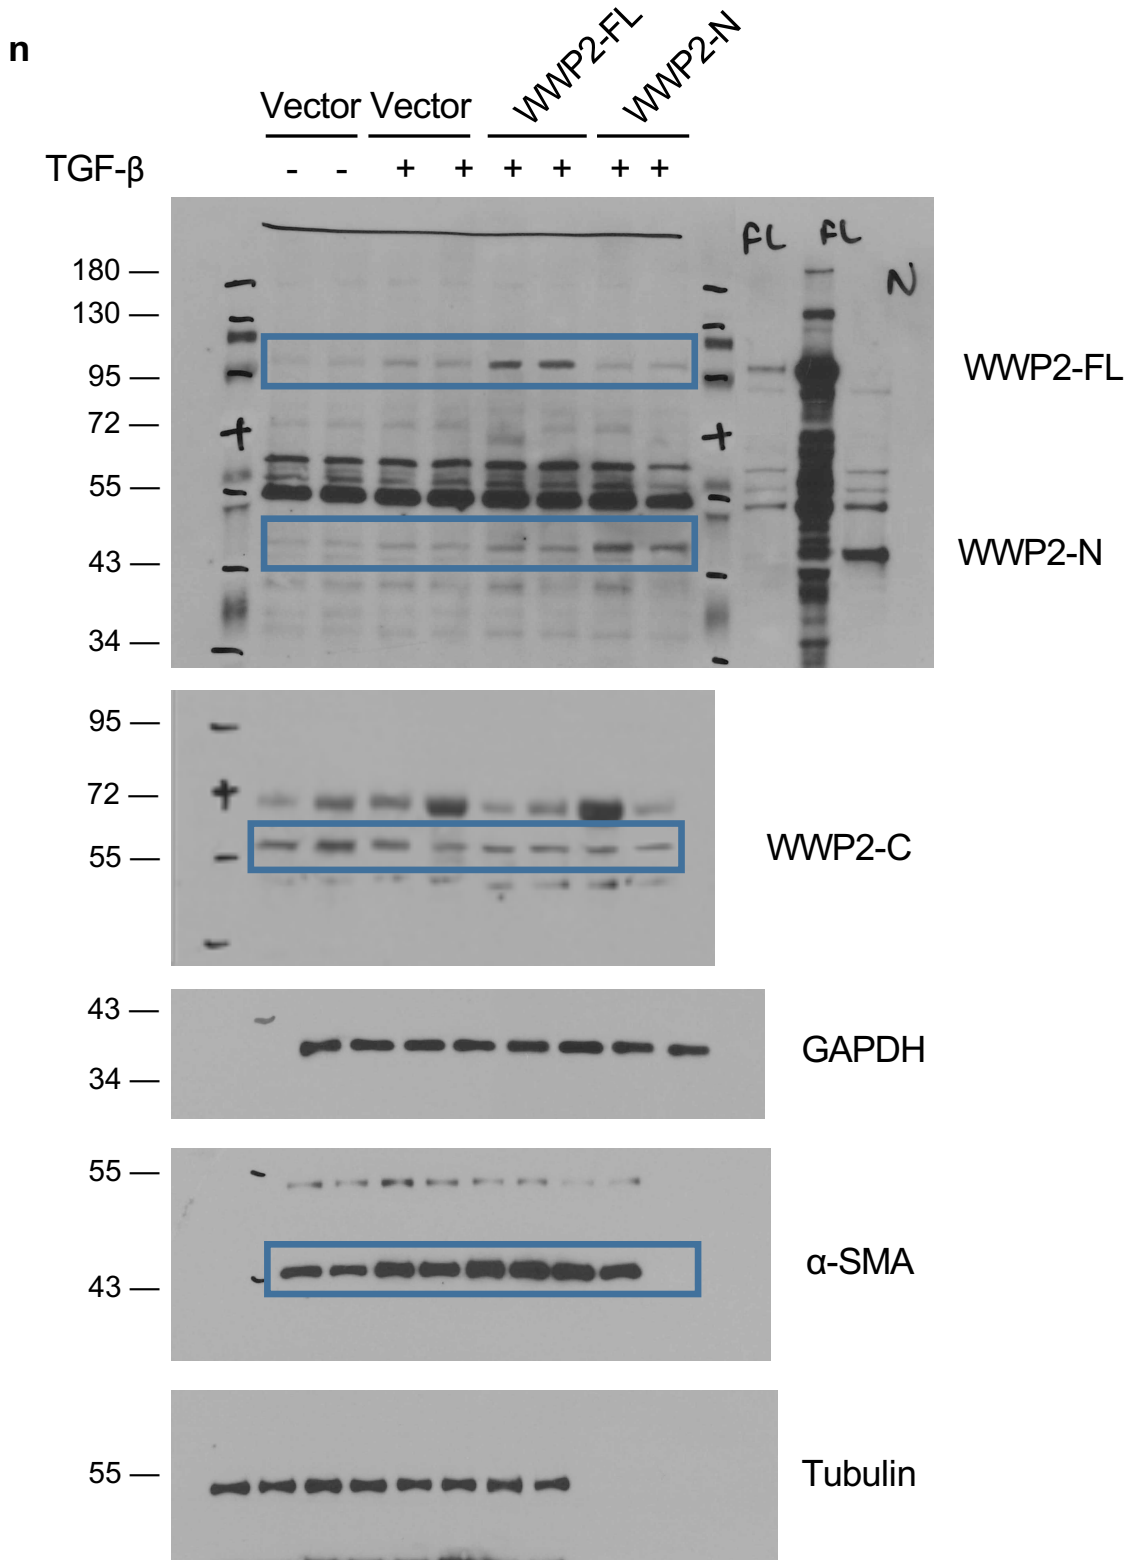

Original blot of Figure 5

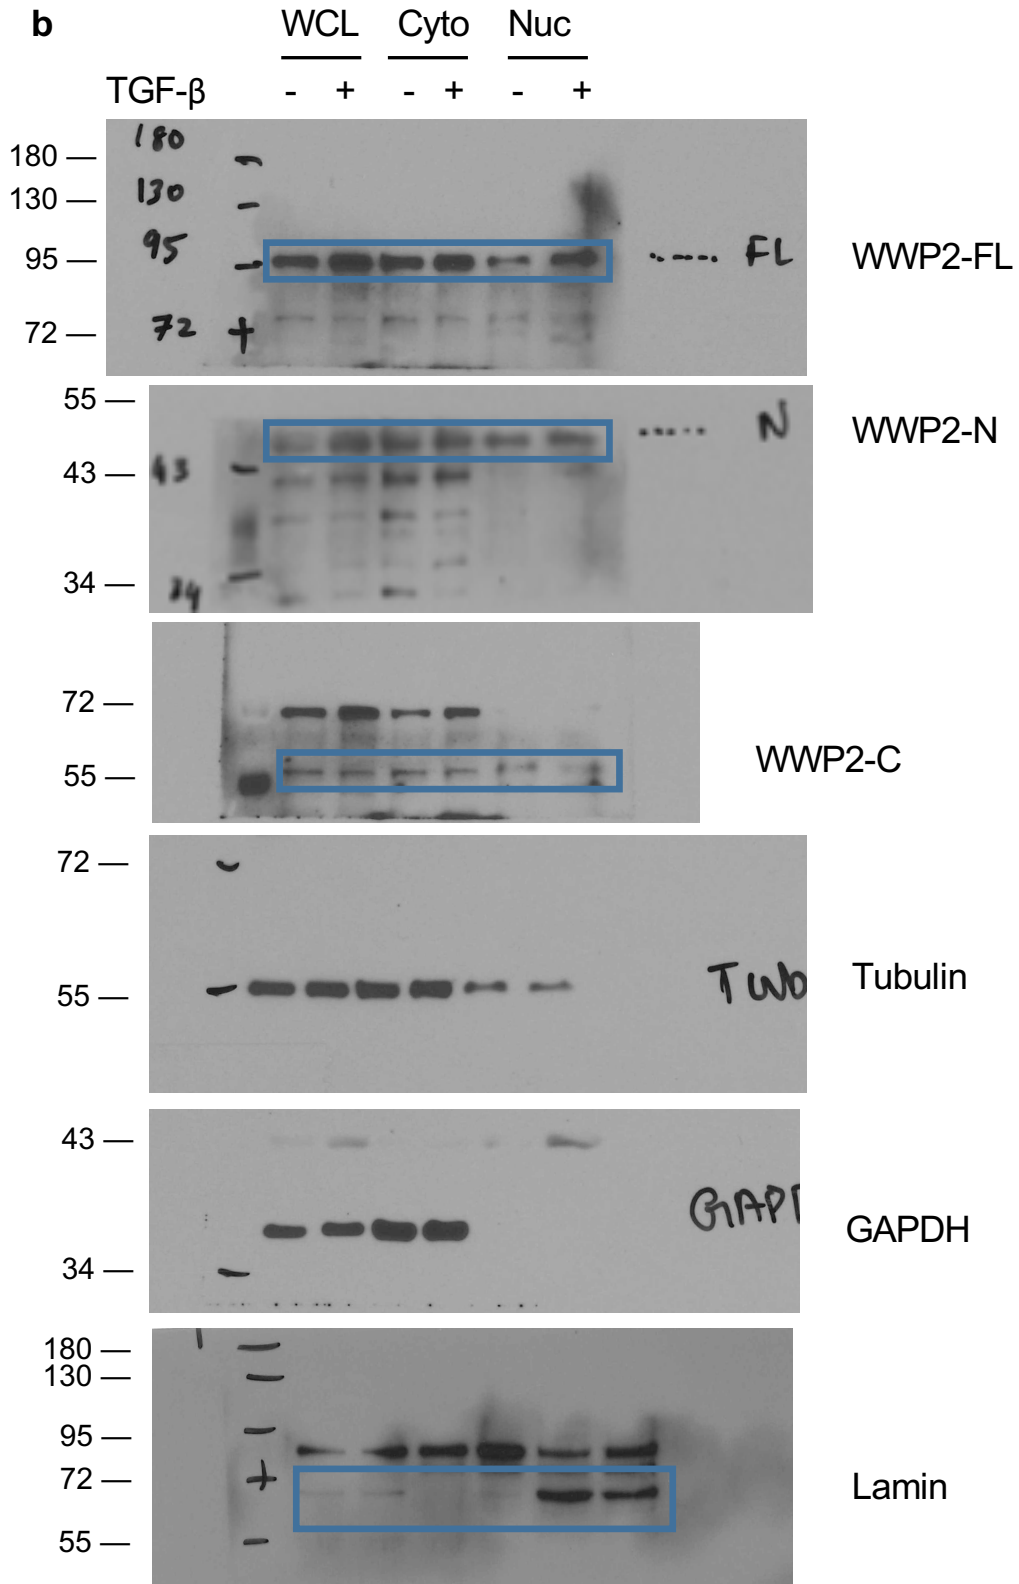

Original blot of Figure 5



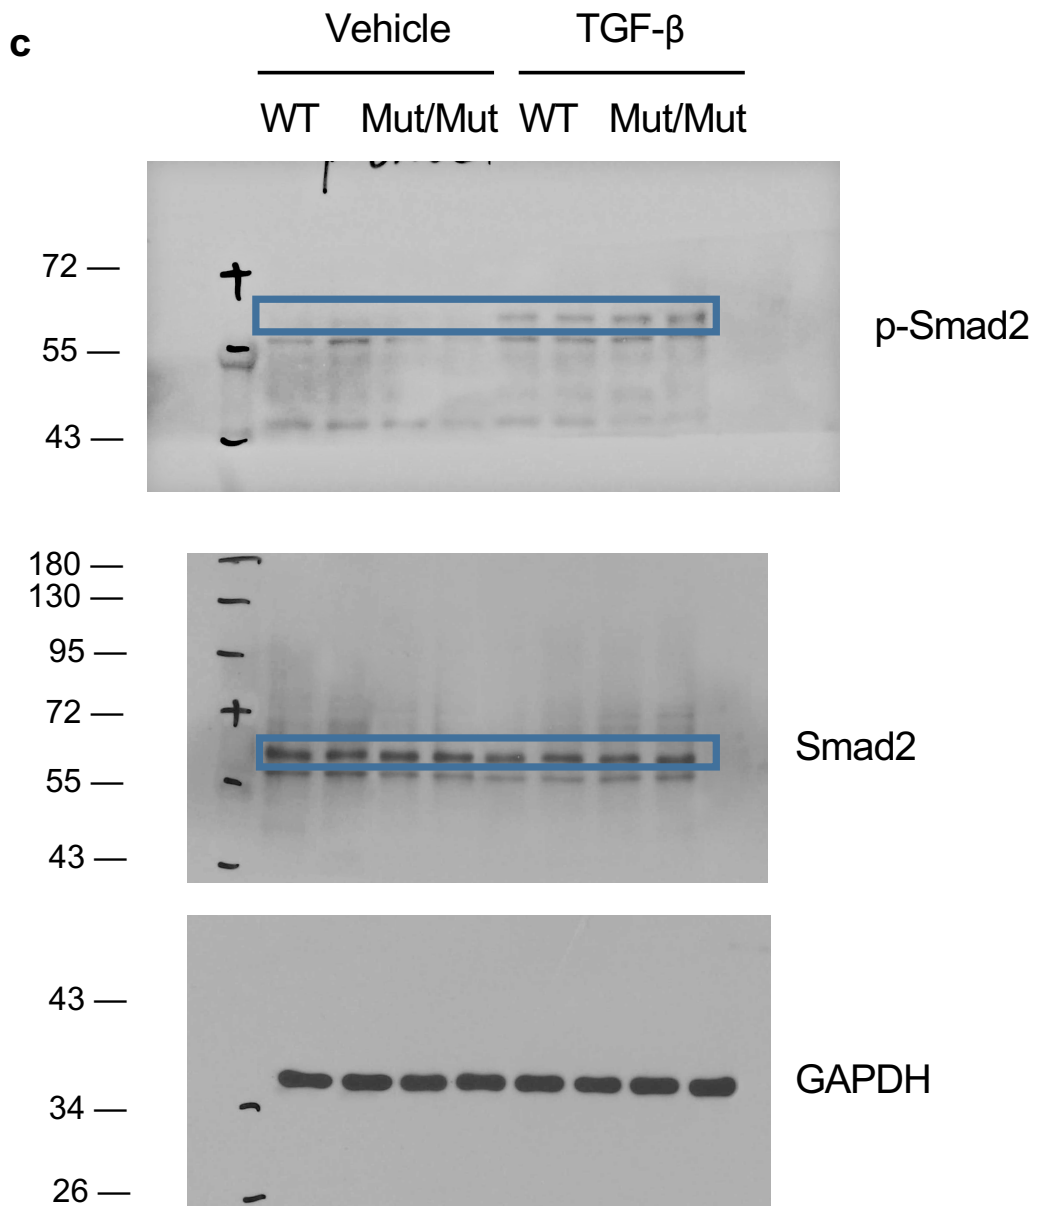

Original blot of Figure 5

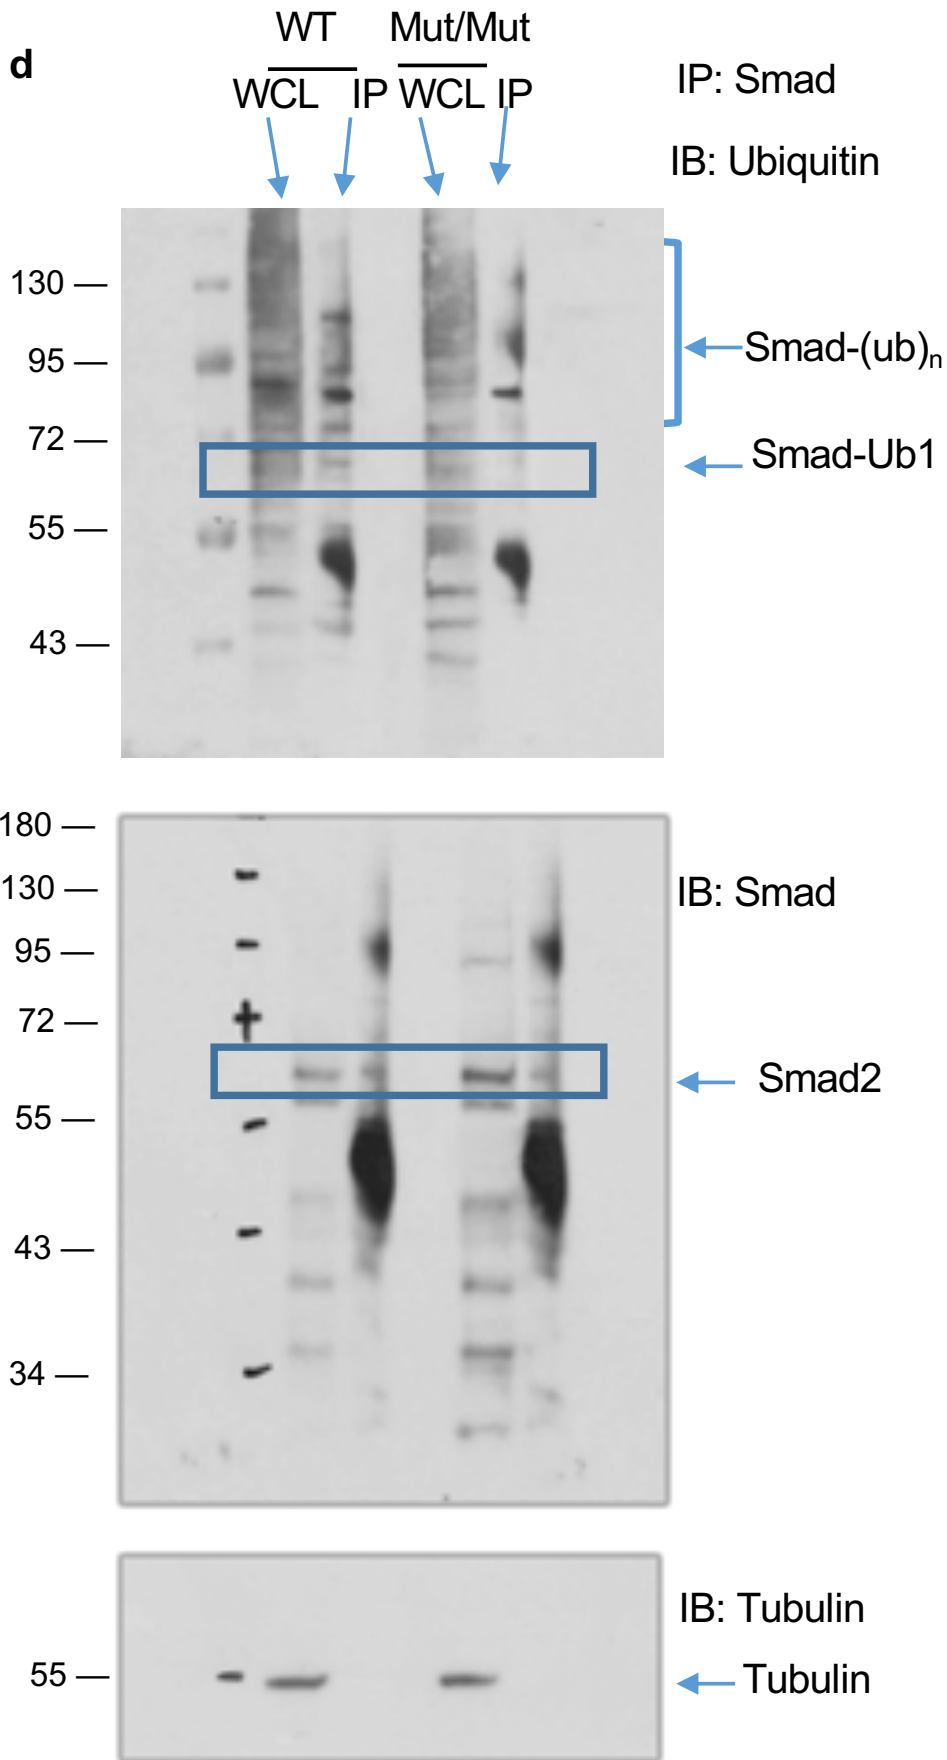

Original blot of Figure 5

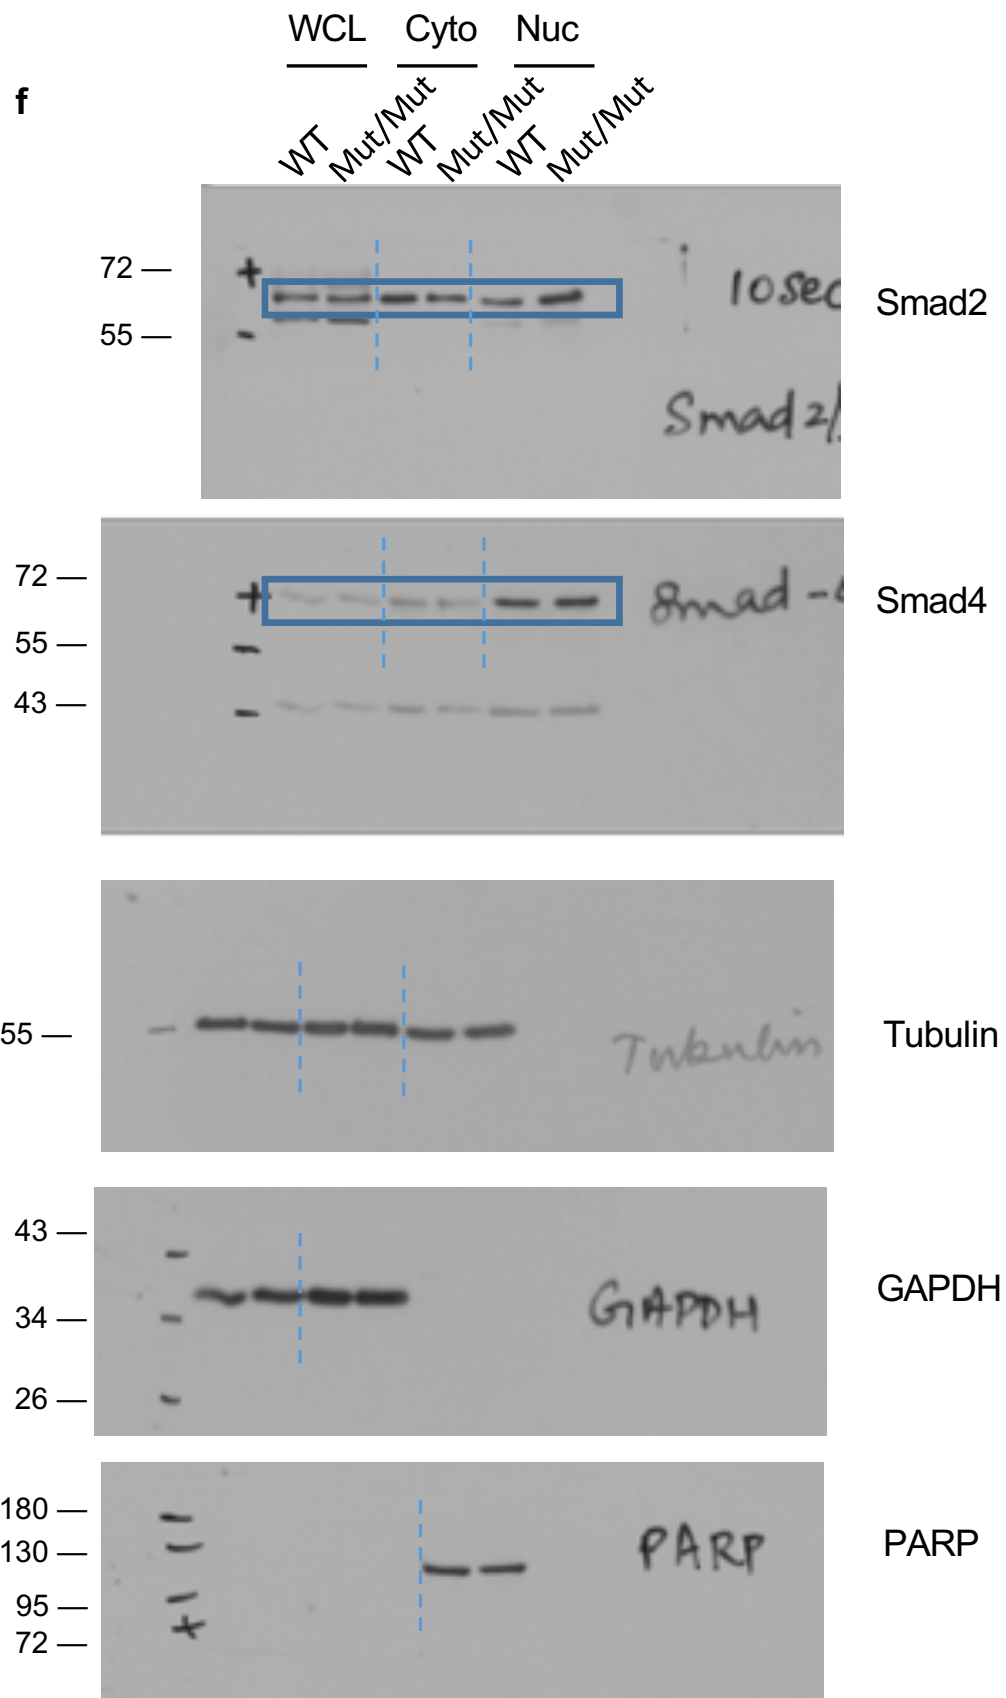

Original blot of Supplementary Figure 2

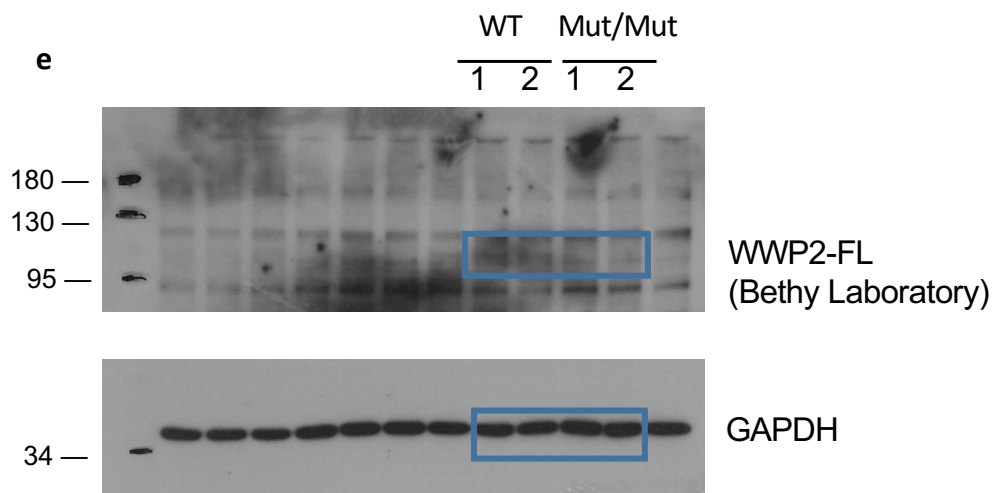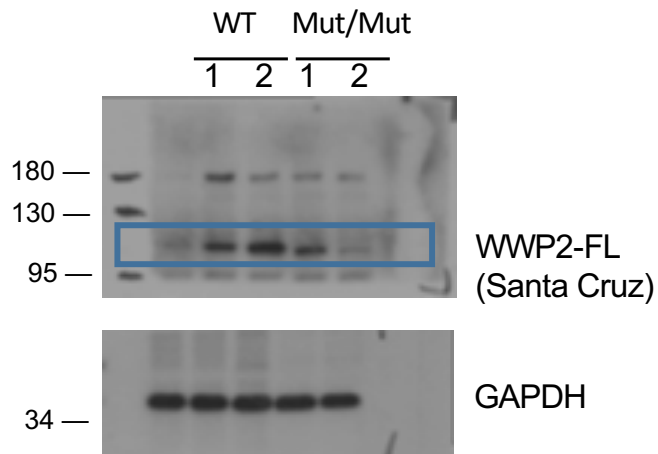

**Original blot of Supplementary Figure 3**

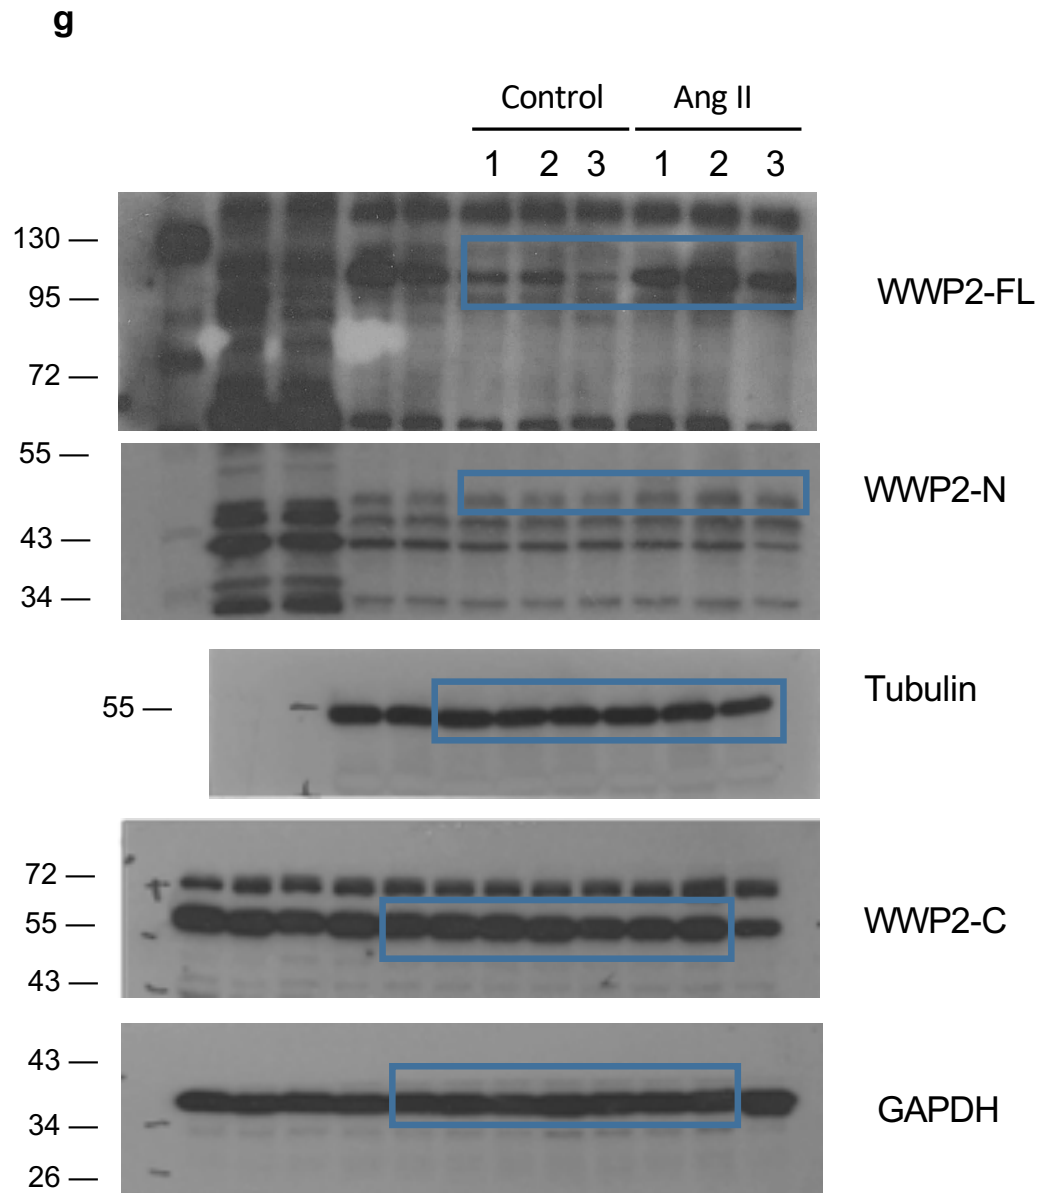

**Original blot of Supplementary Figure 8**

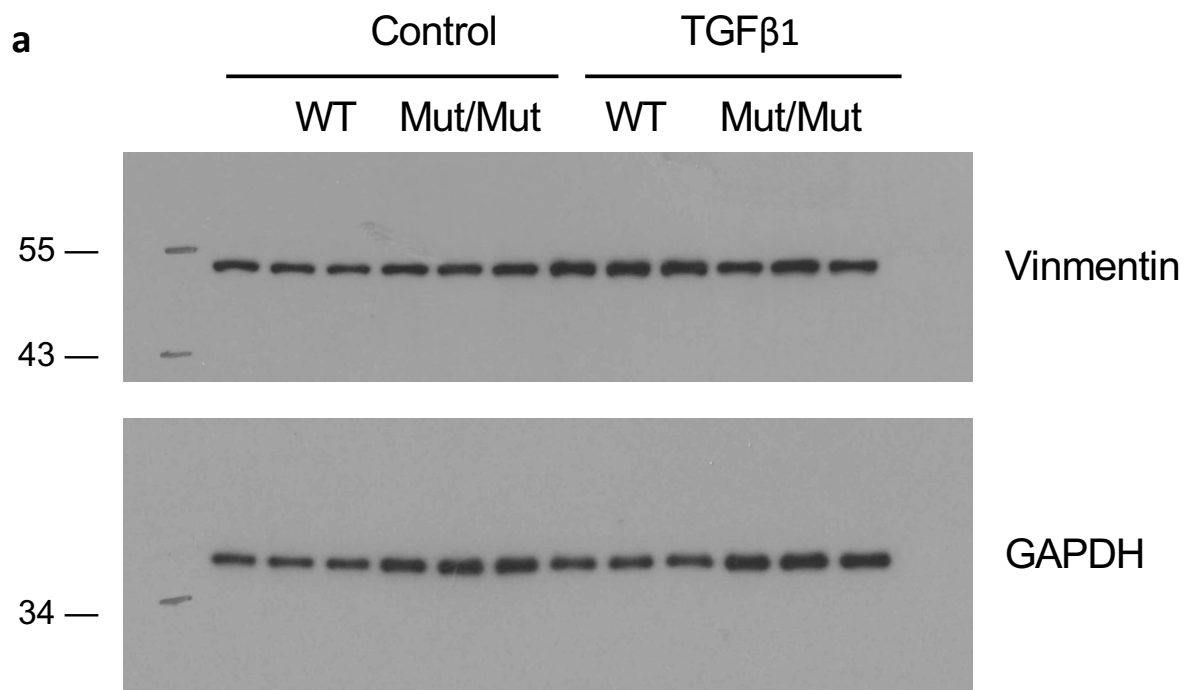

Original blot of Supplementary Figure 11

**d** IP: FLAG

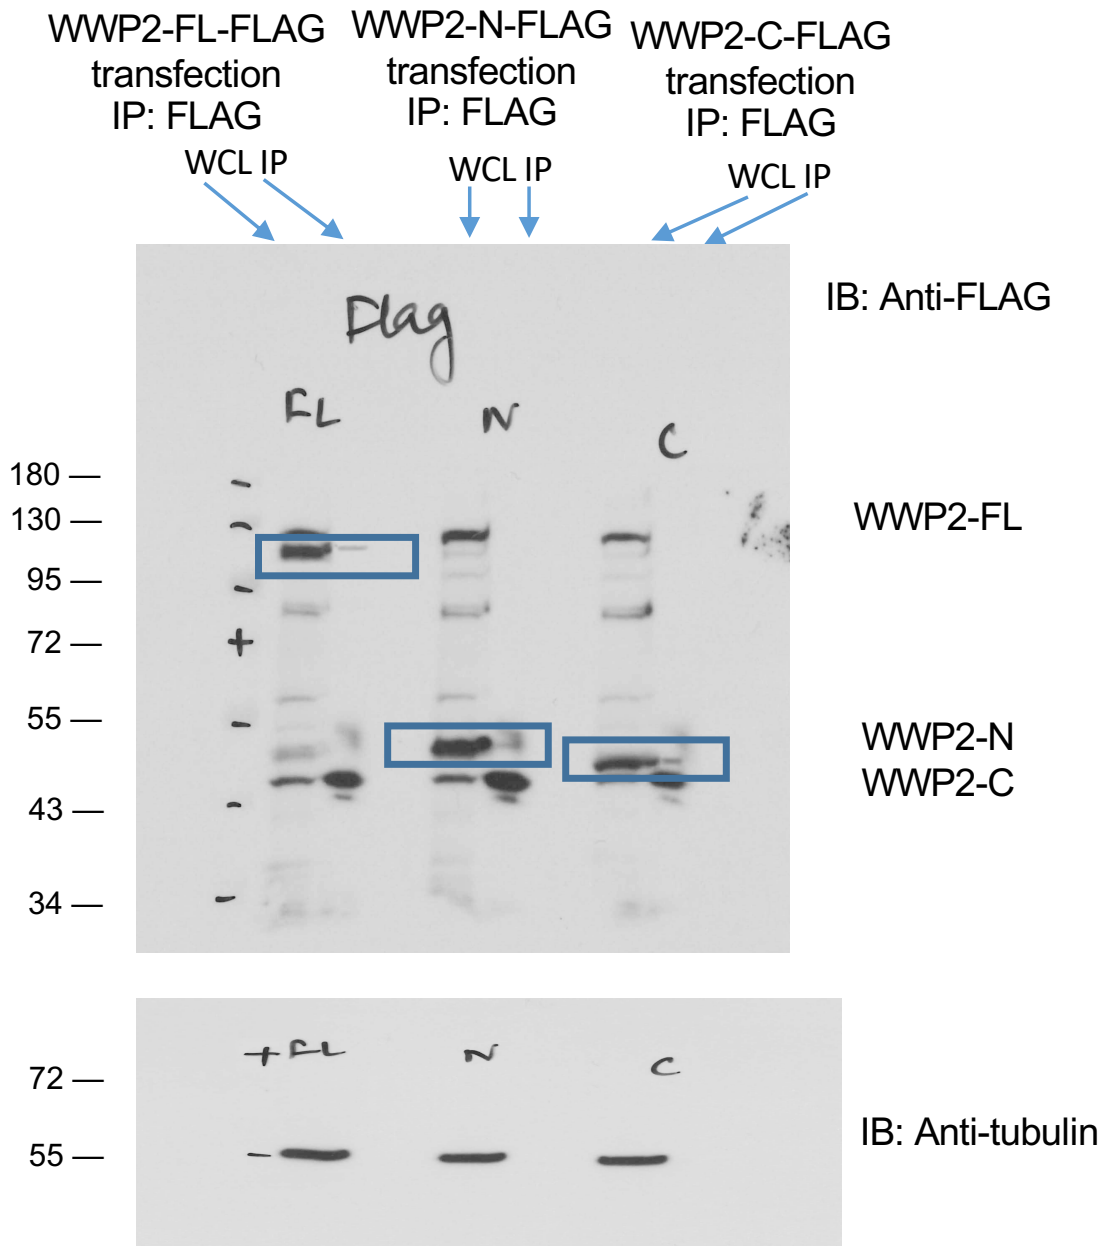

Original blot of Supplementary Figure 11

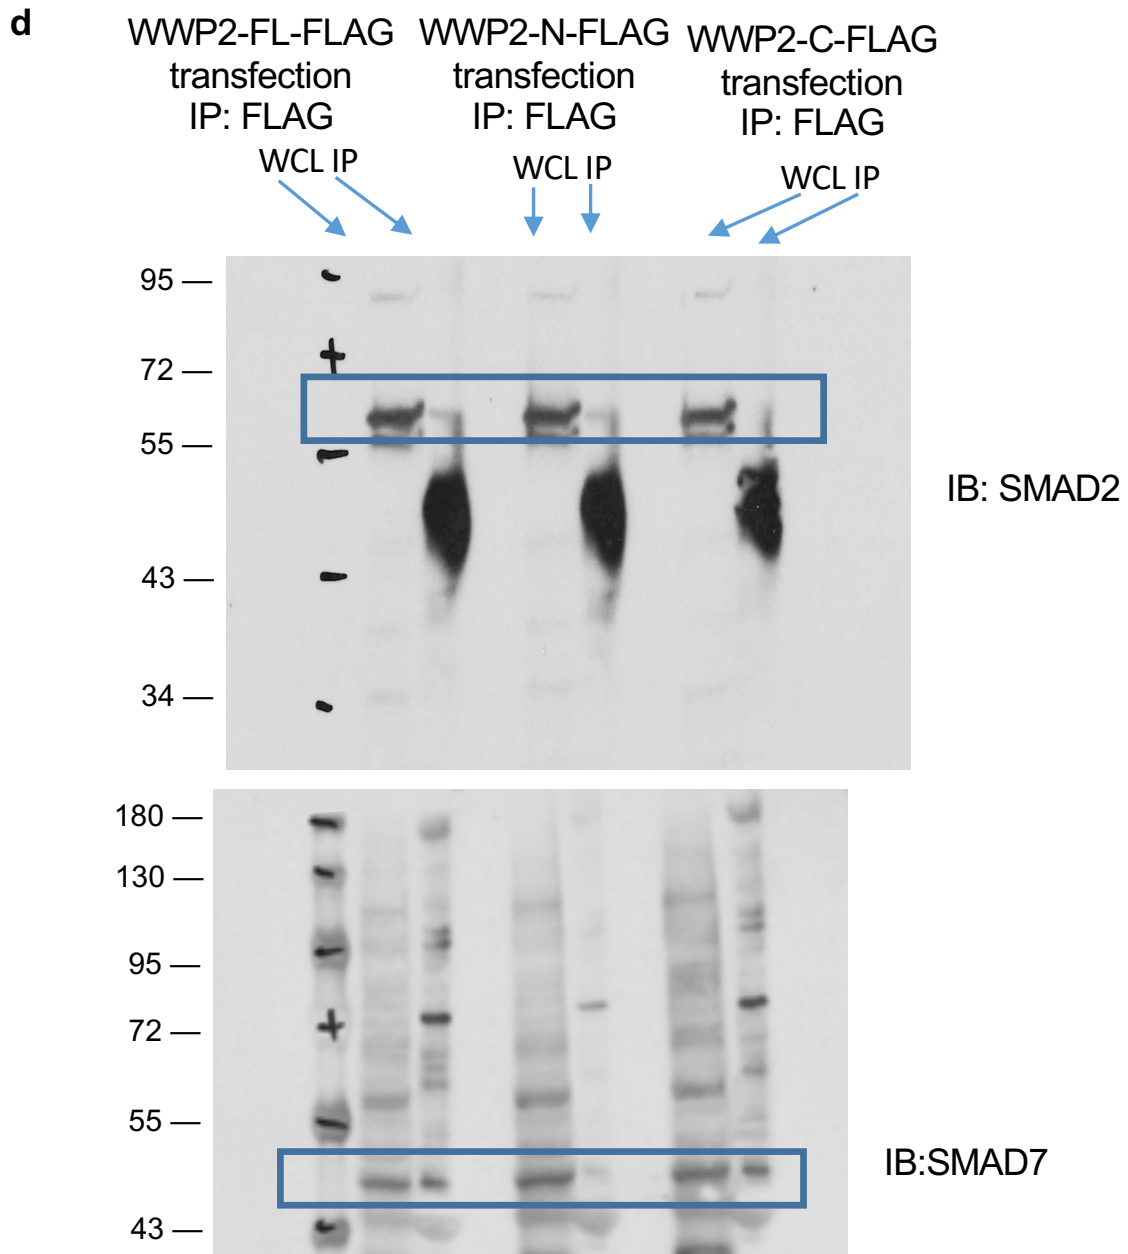

Original blot of Supplementary Figure 11



e

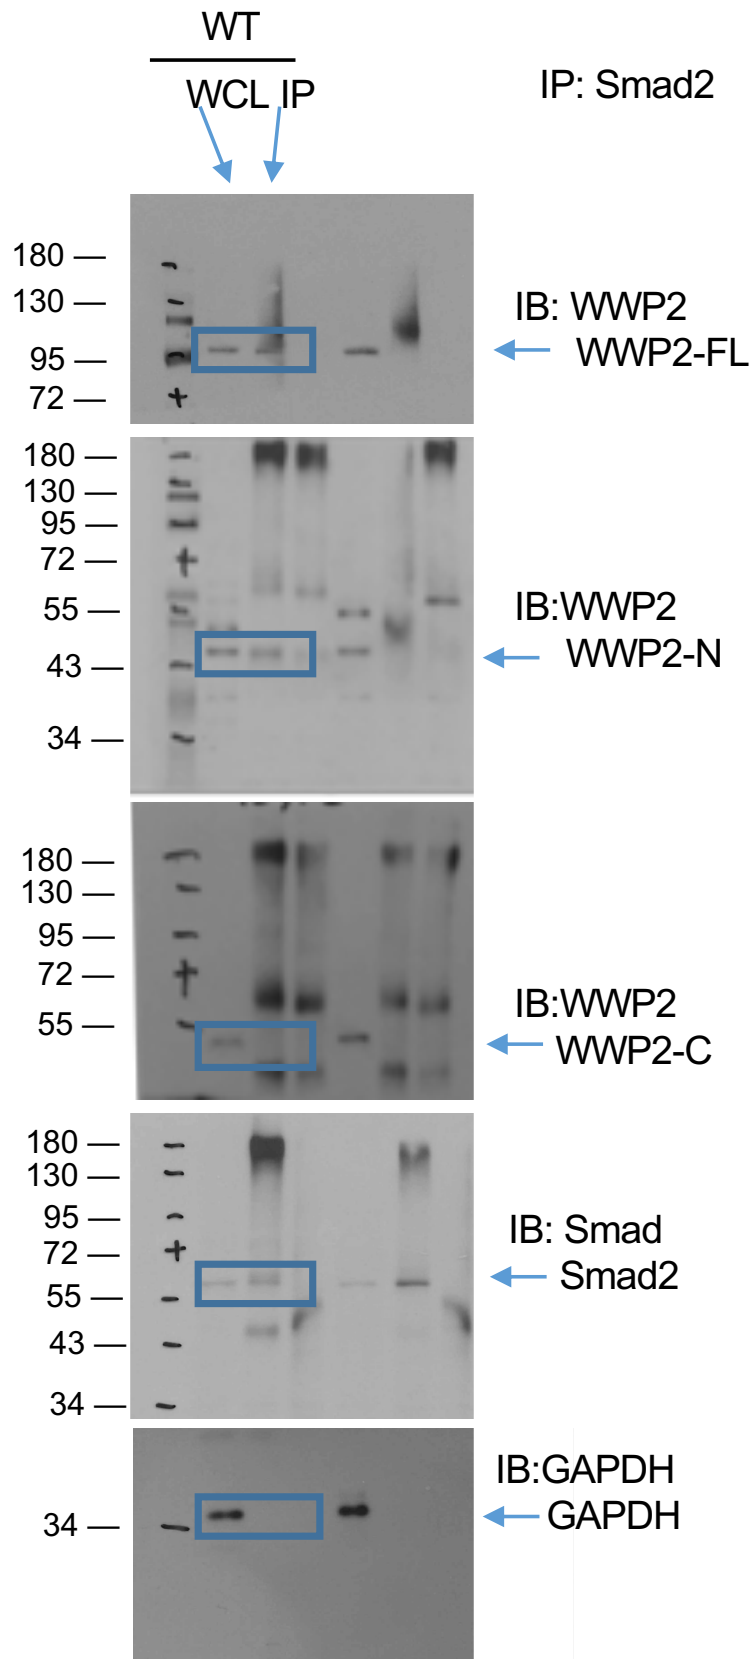

# Original blot of Supplementary Figure 11

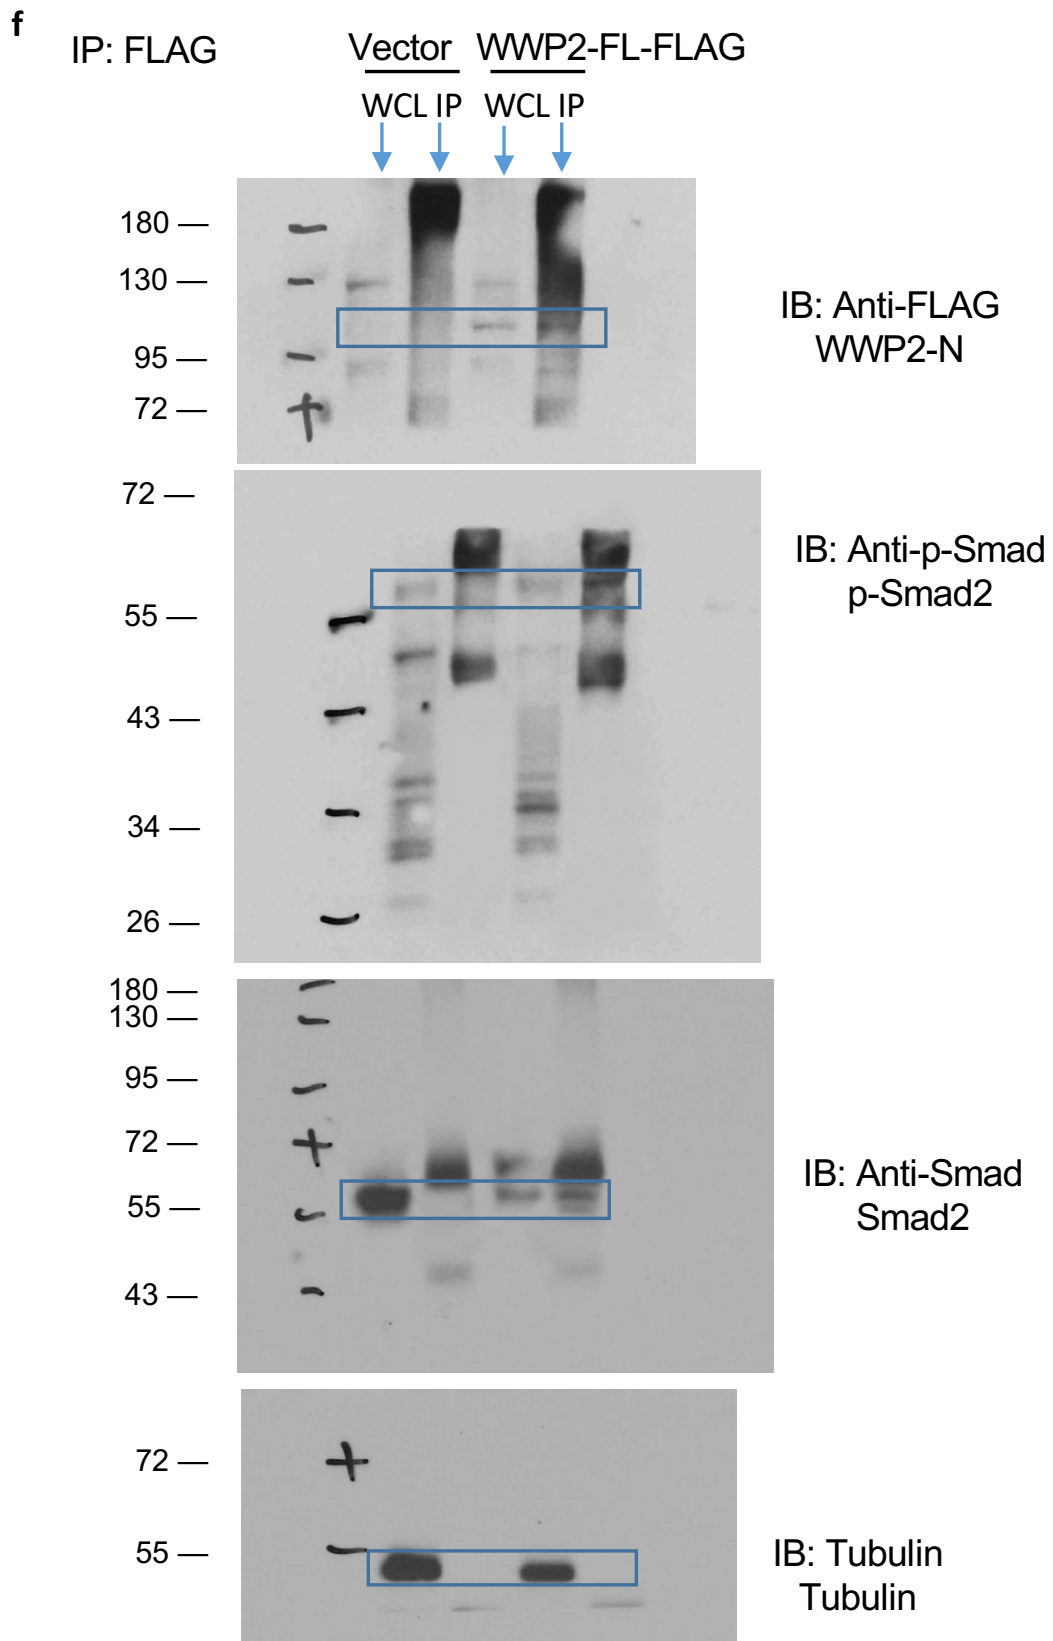

Original blot of Supplementary Figure 11

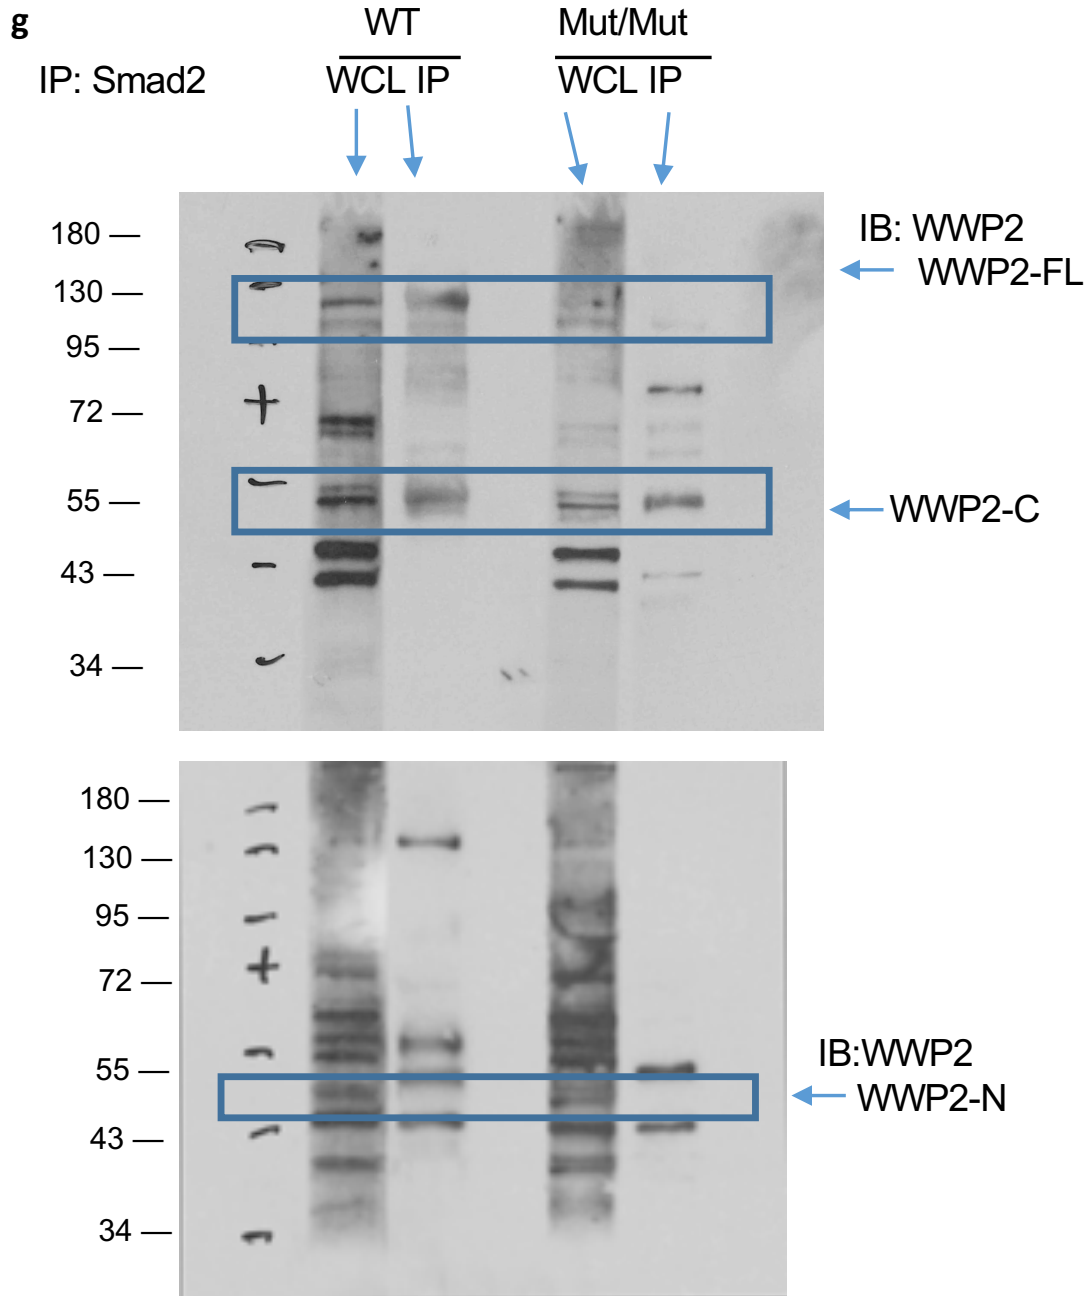

Original blot of Supplementary Figure 11

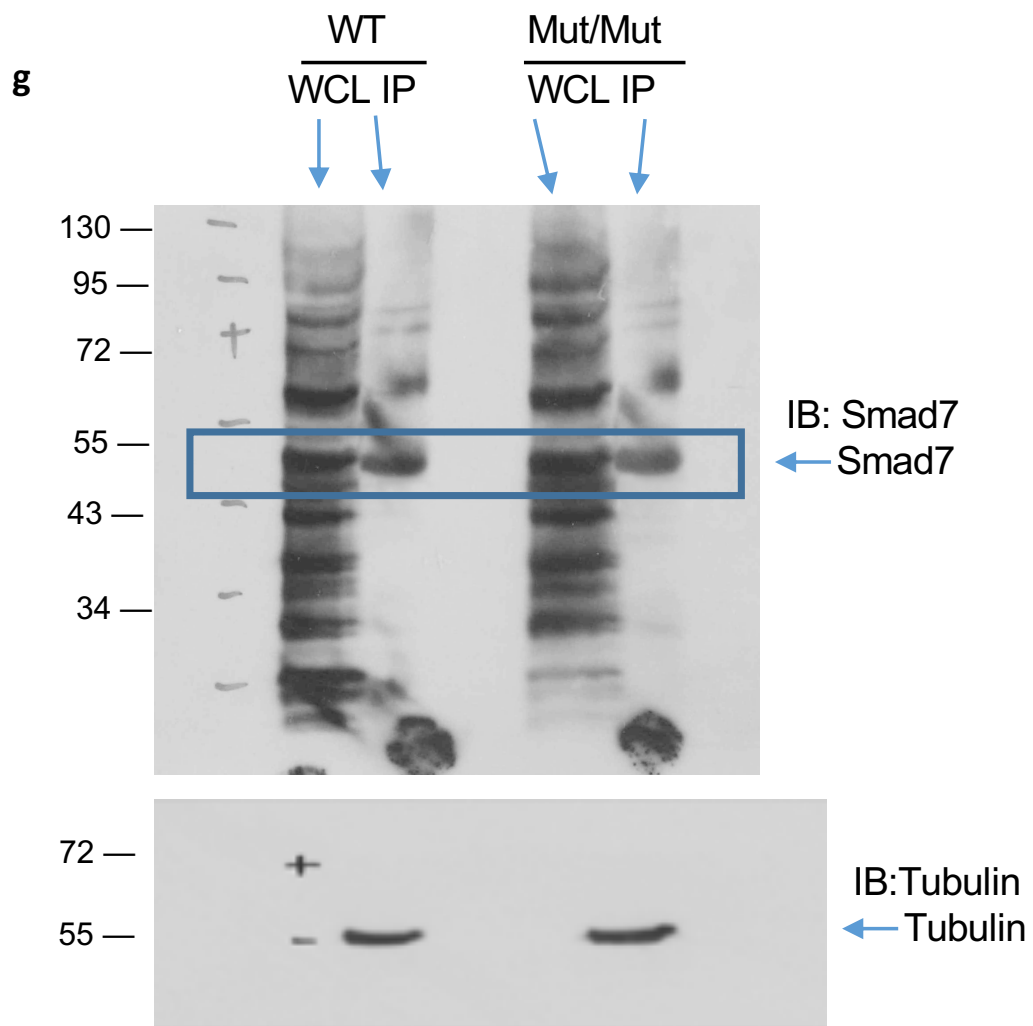

# Original blot of Supplementary Figure 11

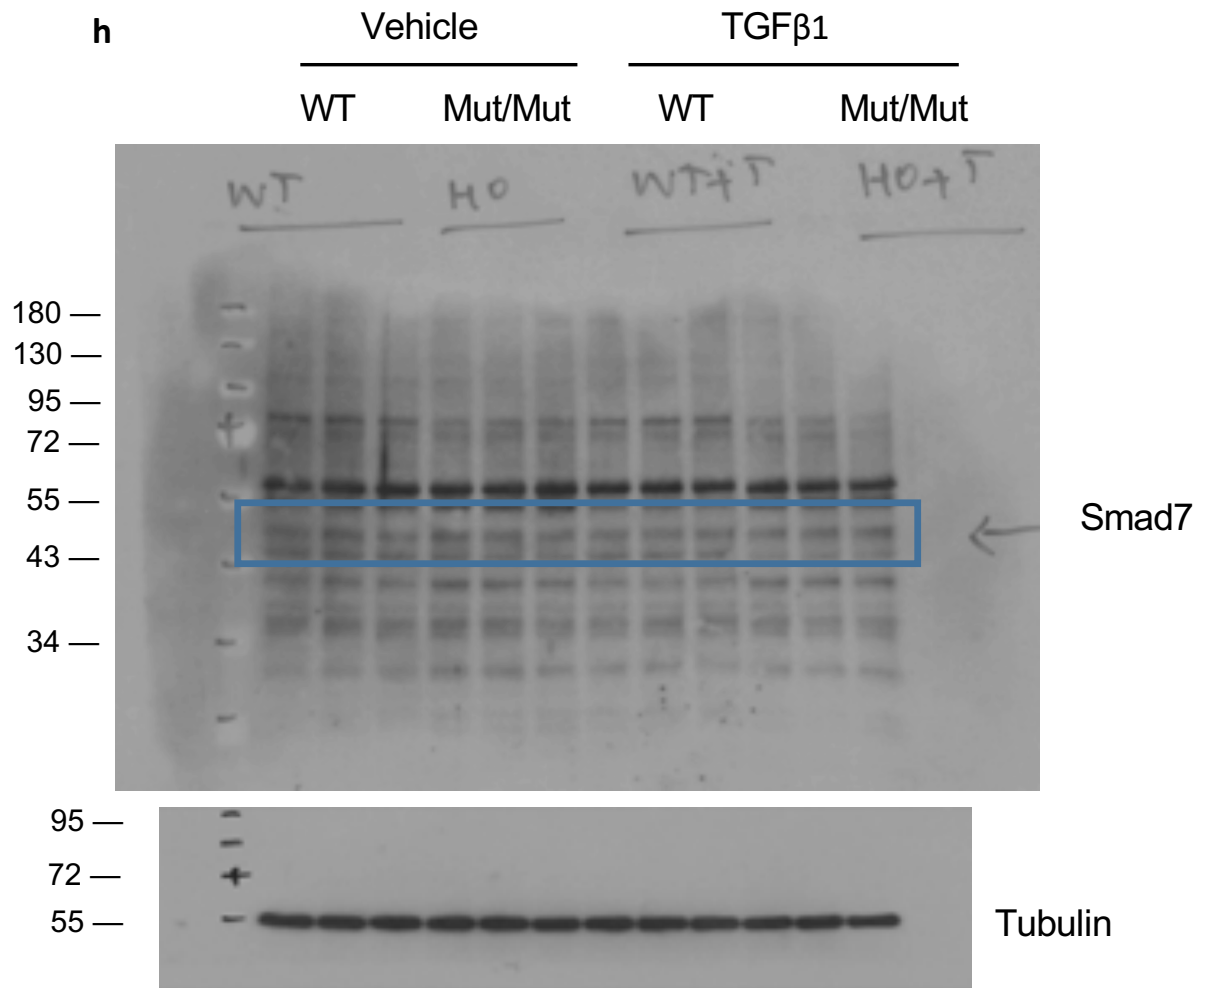

Original blot of Supplementary Figure 11

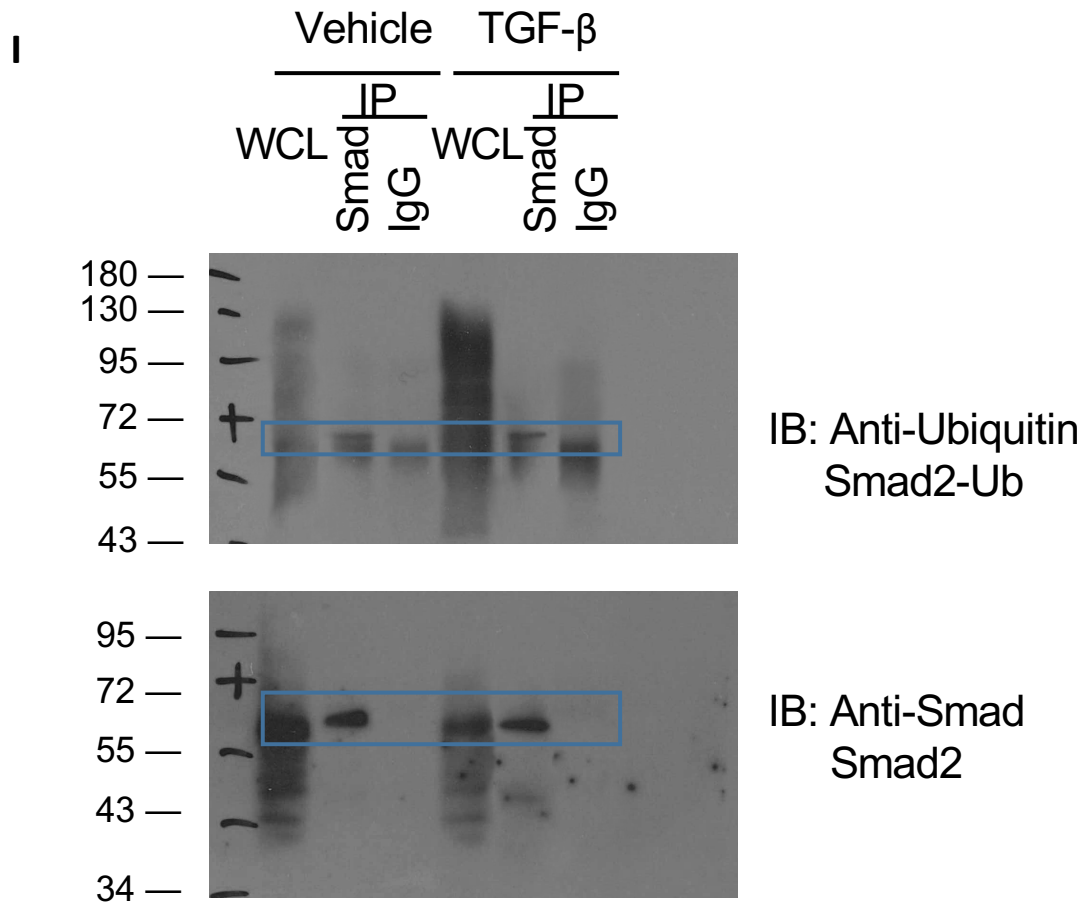

**Original blot of Supplementary Figure 12**

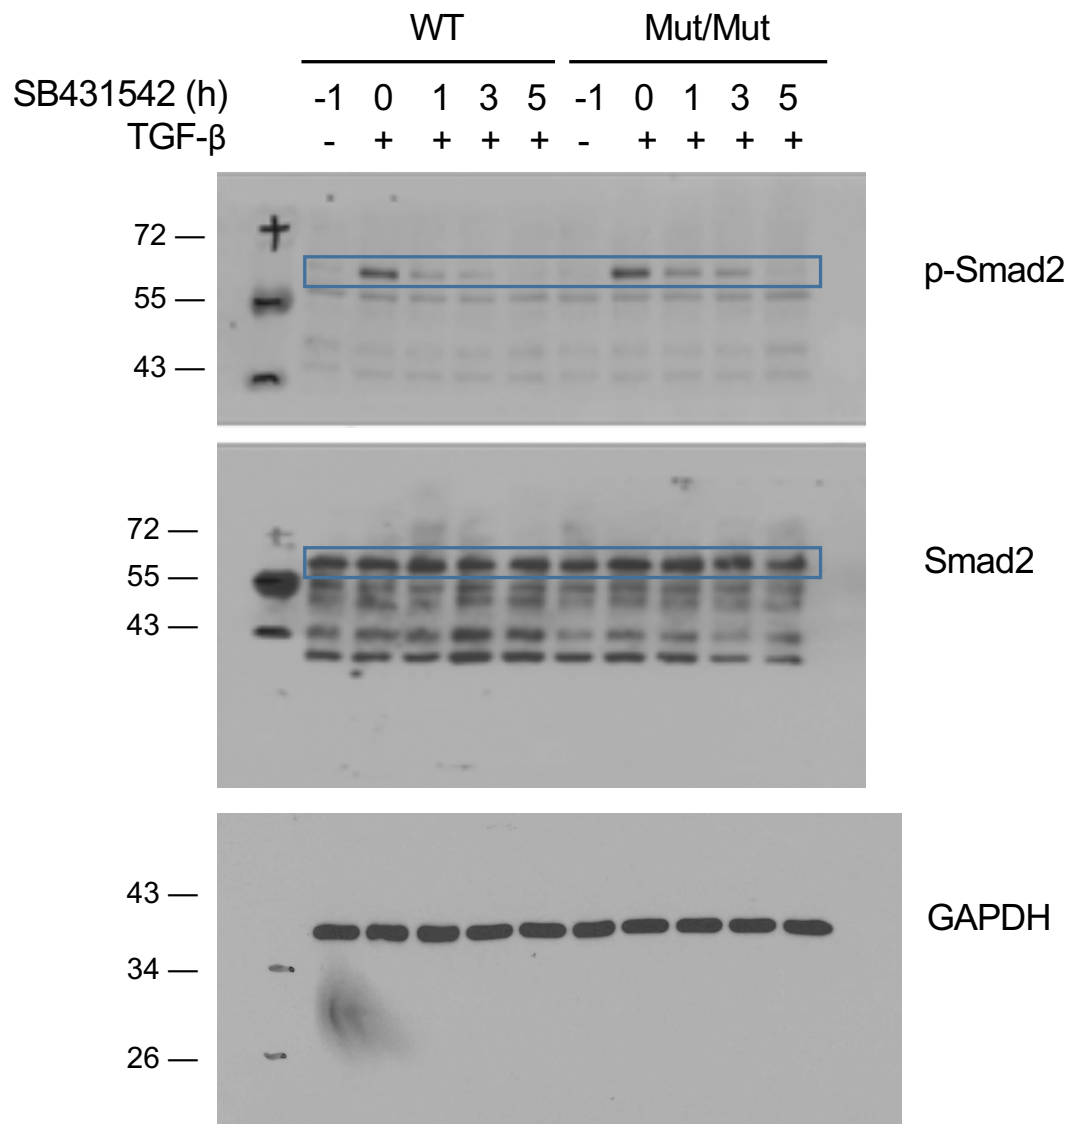

Supplement: 41467_2019_11551_MOESM9_ESM.pdf [file 41467_2019_11551_MOESM9_ESM.pdf]
